# Supplementary material
Source: PubMed Central journal article supplement (PMC3936681)
Supplement: NIHMS552034-supplement-2.pdf [file NIHMS552034-supplement-2.pdf]

Supplemental Table 1 Test Statistics

| Clone           | CR Regimen | Mean Lifespan,<br>days (SEM) | Median Lifespan<br>(days) | Kruskal-Wallis          |          |
|-----------------|------------|------------------------------|---------------------------|-------------------------|----------|
|                 |            |                              |                           | Statistic for<br>Median | p        |
| <b>BmanL5</b>   | AL         | 10.00 (0.30)                 | 10                        | 5.468                   | 0.065    |
|                 | 10         | 11.35 (0.49)                 | 11                        |                         |          |
|                 | IF         | 10.52 (0.57)                 | 10                        |                         |          |
| <b>BmanMAN</b>  | AL         | 11.82 (0.39)                 | 12                        | 29.67                   | < 0.0001 |
|                 | 50         | 13.11 (0.53)                 | 13                        |                         |          |
|                 | 10         | 12.70 (0.44)                 | 13                        |                         |          |
| <b>BmanRUS</b>  | IF         | 9.43 (0.39)                  | 10                        | 195.3                   | < 0.0001 |
|                 | AL         | 8.74 (0.22)                  | 8                         |                         |          |
|                 | 75         | 8.47 (0.28)                  | 8                         |                         |          |
|                 | 50         | 9.19 (0.35)                  | 9                         |                         |          |
|                 | 25         | 9.57 (0.30)                  | 9                         |                         |          |
|                 | 10         | 10.33 (0.26)                 | 10                        |                         |          |
| <b>MNCHU008</b> | IF         | 12.33 (0.28)                 | 12                        | 22.47                   | < 0.0001 |
|                 | AL         | 12.87 (0.43)                 | 13                        |                         |          |
|                 | 10         | 14.43 (0.64)                 | 16                        |                         |          |
| <b>Bp HOS</b>   | IF         | 16.00 (0.67)                 | 17                        | 7.67                    | 0.0216   |
|                 | AL         | 8.69 (0.46)                  | 9                         |                         |          |
|                 | 10         | 11.05 (0.59)                 | 10                        |                         |          |
| <b>BpL1</b>     | IF         | 10.06 (0.93)                 | 11                        | 2.045                   | 0.563    |
|                 | AL         | 10.05 (0.63)                 | 10                        |                         |          |
|                 | 50         | 11.58 (0.89)                 | 12                        |                         |          |
| <b>BpL3</b>     | 10         | 10.35 (0.73)                 | 11                        | 3.469                   | 0.1765   |
|                 | IF         | 10.21 (0.60)                 | 11                        |                         |          |
|                 | AL         | 8.68 (0.84)                  | 10                        |                         |          |
| <b>BpSAL</b>    | 10         | 10.56 (0.81)                 | 12                        | 9.67                    | 0.0079   |
|                 | IF         | 10.95 (0.91)                 | 13                        |                         |          |
|                 | AL         | 10.73 (0.57)                 | 10                        |                         |          |
| <b>CGAL6</b>    | 10         | 11.90 (0.45)                 | 12                        | 134.9                   | < 0.0001 |
|                 | IF         | 9.83 (0.57)                  | 10                        |                         |          |
|                 | AL         | 11.62 (0.59)                 | 13                        |                         |          |
|                 | 75         | 10.43 (0.72)                 | 10                        |                         |          |
|                 | 50         | 11.98 (0.85)                 | 12                        |                         |          |
|                 | 25         | 13.05 (0.94)                 | 13                        |                         |          |
| <b>USGET006</b> | 10         | 10.95 (0.62)                 | 10                        | 3.339                   | 0.3422   |
|                 | IF         | 6.05 (0.33)                  | 6                         |                         |          |
|                 | 0          | 4.65 (0.09)                  | 5                         |                         |          |
|                 | AL         | 9.60 (0.54)                  | 10                        |                         |          |
|                 | 50         | 9.65 (0.43)                  | 10                        |                         |          |
|                 | 10         | 9.18 (0.69)                  | 10.5                      |                         |          |
| <b>JPNAG023</b> | IF         | 8.84 (0.29)                  | 9                         | 6.965                   | 0.073    |
|                 | AL         | 7.76 (0.44)                  | 8                         |                         |          |
|                 | 50         | 9.20 (0.69)                  | 8                         |                         |          |
| <b>AUYEN020</b> | 10         | 9.70 (0.84)                  | 9                         | 15.64                   | 0.0013   |
|                 | IF         | 6.17 (0.82)                  | 7                         |                         |          |
|                 | AL         | 4.54 (0.23)                  | 4                         |                         |          |
|                 | 50         | 5.41 (0.45)                  | 5                         |                         |          |
|                 | 10         | 6.35 (0.51)                  | 6                         |                         |          |
|                 | IF         | 7.12 (0.60)                  | 7                         |                         |          |

bold denotes statistically significant difference between the treatment and the AL food level ( $p < 0.05$ , Student's

Note: Mantel cox chi-squared and Kruskal-Wallis statistic for 100% treatment are for comparison of all curves c  
degrees of freedom for kruskal-wallis and mantel-cox: number of treatments -1

| Rank Difference<br>Dunns Mult.<br>Compar. | p                  | Survivorship<br>Mantel-Cox<br>Chi-squared | Survivorship<br>Mantel-Cox<br>df | Survivorship<br>Mantel-Cox<br>p | Maximum<br>Lifespan, days<br>(95th percentile) | Gompertz b<br>(slope)<br>(SEM) |
|-------------------------------------------|--------------------|-------------------------------------------|----------------------------------|---------------------------------|------------------------------------------------|--------------------------------|
| -11.83                                    | 0.0786             | 6.864                                     | 2                                | <b>0.0323</b>                   | 13                                             | 0.646 (0.413)                  |
| -0.3152                                   | > 0.9999           | 9.65                                      | 1                                | <b>0.0019</b>                   | 17                                             | 0.418 (0.078)                  |
| -12.33                                    | 0.3204             | 0.9353                                    | 1                                | 0.3335                          | 16                                             | -0.093 (0.049)                 |
| -9.886                                    | 0.5237             | 42.34                                     | 3                                | <b>&lt; 0.0001</b>              | 17                                             | 0.594 (0.086)                  |
| 24.47                                     | <b>0.0031</b>      | 4.024                                     | 1                                | <b>0.0449</b>                   | 19                                             | 0.323 (0.108)                  |
| 11.35                                     | > 0.9999           | 1.939                                     | 1                                | 0.1637                          | 17                                             | 0.425 (0.110)                  |
| -14.58                                    | > 0.9999           | 15.54                                     | 1                                | <b>&lt; 0.0001</b>              | 13                                             | 0.503 (0.270)                  |
| -40.45                                    | 0.1971             | 424.5                                     | 6                                | <b>&lt; 0.0001</b>              | 14                                             | 0.829 (0.141)                  |
| -77.18                                    | <b>0.0004</b>      | 0.3208                                    | 1                                | 0.5711                          | 15                                             | 0.674 (0.164)                  |
| -132.8                                    | <b>&lt; 0.0001</b> | 1.396                                     | 1                                | 0.2375                          | 17                                             | 0.495 (0.111)                  |
| 117.9                                     | <b>&lt; 0.0001</b> | 5.45                                      | 1                                | <b>0.0196</b>                   | 17                                             | 0.450 (0.076)                  |
| -21.84                                    | <b>0.0146</b>      | 20.78                                     | 1                                | <b>&lt; 0.0001</b>              | 15                                             | 0.500 (0.109)                  |
| -39.32                                    | <b>&lt; 0.0001</b> | 51.34                                     | 1                                | <b>&lt; 0.0001</b>              | 16                                             | 0.488 (0.138)                  |
| -13.08                                    | <b>0.0176</b>      | 103.7                                     | 1                                | <b>&lt; 0.0001</b>              | 7                                              | NA                             |
| -11.06                                    | 0.0668             | 36.77                                     | 2                                | <b>&lt; 0.0001</b>              | 18                                             | 0.362 (0.013)                  |
| -10.85                                    | 0.5172             | 15.06                                     | 1                                | <b>0.0001</b>                   | 21                                             | 0.336 (0.016)                  |
| -3.526                                    | > 0.9999           | 34                                        | 1                                | <b>&lt; 0.0001</b>              | 22                                             | 0.300 (0.017)                  |
| -3.596                                    | > 0.9999           | 2.407                                     | 2                                | 0.3002                          | 12                                             | 0.405 (0.052)                  |
| -8.009                                    | 0.2949             | 0.7622                                    | 1                                | 0.3826                          | 17                                             | 0.300 (0.100)                  |
| -9.271                                    | 0.1631             | 2.901                                     | 1                                | 0.0885                          | 14                                             | 0.269 (0.144)                  |
| -9.338                                    | 0.2075             | 4.028                                     | 3                                | 0.2584                          | 18                                             | 0.275 (0.116)                  |
| 6.559                                     | 0.4886             | 1.586                                     | 1                                | 0.2079                          | 21                                             | 0.172 (0.048)                  |
| 25.04                                     | > 0.9999           | 0.03381                                   | 1                                | 0.8541                          | 19                                             | 0.319 (0.088)                  |
| 6.803                                     | > 0.9999           | 0.00001261                                | 1                                | 0.9972                          | 16                                             | 0.283 (0.117)                  |
| -6.955                                    | > 0.9999           | 4.247                                     | 2                                | 0.1196                          | 15                                             | 0.229 (0.060)                  |
| 14.42                                     | > 0.9999           | 3.848                                     | 1                                | <b>0.0498</b>                   | 16                                             | 0.118 (0.033)                  |
| 108.1                                     | <b>&lt; 0.0001</b> | 1.973                                     | 1                                | 0.1601                          | 17                                             | 0.171 (0.037)                  |
| 148.8                                     | <b>&lt; 0.0001</b> | 2.812                                     | 2                                | 0.2451                          | 15                                             | 0.198 (0.174)                  |
| 3.275                                     | > 0.9999           | 0.8471                                    | 1                                | 0.3574                          | 17                                             | 0.337 (0.291)                  |
| 1.275                                     | > 0.9999           | 0.9296                                    | 1                                | 0.335                           | 16                                             | 0.304 (0.138)                  |
| 12.24                                     | 0.2951             | 253.9                                     | 6                                | <b>&lt; 0.0001</b>              | 18                                             | 0.2631 (0.0428)                |
| -6.645                                    | 0.8469             | 0.03216                                   | 1                                | 0.8577                          | 20                                             | 0.147 (0.0361)                 |
| -12.15                                    | 0.3302             | 0.04207                                   | 1                                | 0.8375                          | 30                                             | 0.1523 (0.033)                 |
| 6.099                                     | > 0.9999           | 4.858                                     | 1                                | <b>0.0275</b>                   | 32                                             | 0.148 (0.029)                  |
| -8.441                                    | 0.7268             | 0.2394                                    | 1                                | 0.6246                          | 21                                             | 0.273 (0.051)                  |
| -19.31                                    | <b>0.0205</b>      | 42.38                                     | 1                                | <b>&lt; 0.0001</b>              | 14                                             | 0.285 (0.269)                  |
| -28.19                                    | <b>0.0008</b>      | 72.79                                     | 1                                | <b>&lt; 0.0001</b>              | 6                                              | 2.154 (3.4x10 <sup>38</sup> )  |
|                                           |                    | 6.481                                     | 3                                | 0.0904                          | 13                                             | 0.043 (0.012)                  |
|                                           |                    | 0.00001641                                | 1                                | 0.9968                          | 14                                             | 0.075 (0.028)                  |
|                                           |                    | 0.01975                                   | 1                                | 0.8882                          | 14                                             | 0.047 (0.020)                  |
|                                           |                    | 5.606                                     | 1                                | <b>0.0179</b>                   | 10                                             | 0.047 (0.017)                  |
|                                           |                    | 11.11                                     | 3                                | <b>0.0111</b>                   | 11                                             | 0.399 (0.072)                  |
|                                           |                    | 2.315                                     | 1                                | 0.1281                          | 17                                             | 0.221 (0.204)                  |
|                                           |                    | 7.392                                     | 1                                | <b>0.0066</b>                   | 14                                             | 0.513 (0.166)                  |
|                                           |                    | 0.3385                                    | 1                                | 0.5607                          | 12                                             | 0.226 (0.091)                  |
|                                           |                    | 18.46                                     | 3                                | <b>0.0004</b>                   | 6                                              | 0.336 (0.577)                  |
|                                           |                    | 2.848                                     | 1                                | 0.0915                          | 10                                             | 0.144 (0.249)                  |
|                                           |                    | 9.795                                     | 1                                | <b>0.0017</b>                   | 11                                             | 0.219 (0.120)                  |
|                                           |                    | 16.34                                     | 1                                | <b>&lt; 0.0001</b>              | 11                                             | 0.267 (0.119)                  |

t test)

or medians at same time

| Gompertz b<br>F-test<br>Statistic | Gompertz b<br>Dfd | Gompertz b<br>p | Gompertz a<br>(intercept)<br>(SEM) | Gompertz a<br>F-test<br>Statistic | Gompertz a<br>Dfd | Gompertz a<br>p   |
|-----------------------------------|-------------------|-----------------|------------------------------------|-----------------------------------|-------------------|-------------------|
|                                   |                   |                 | -8.048 (3.864)                     |                                   |                   |                   |
| 0.574                             | 6                 | 0.478           | -6.301 (0.909)                     | 0.745                             | 7                 | 0.417             |
| 7.686                             | 7                 | <b>0.028</b>    | -0.284 (0.598)                     | NA                                | NA                | NA                |
|                                   |                   |                 | -8.352 (1.031)                     |                                   |                   |                   |
| 3.861                             | 6                 | 0.097           | -5.676 (1.416)                     | 7.082                             | 7                 | <b>0.032</b>      |
| 1.114                             | 7                 | 0.326           | -6.886 (1.400)                     | 3.326                             | 8                 | 0.106             |
| 0.118                             | 6                 | 0.743           | -6.386 (2.457)                     | 4.159                             | 7                 | 0.08              |
|                                   |                   |                 | -8.687 (1.262)                     |                                   |                   |                   |
| 0.397                             | 8                 | 0.546           | -7.435 (1.355)                     | 0.022                             | 9                 | 0.885             |
| 3.257                             | 7                 | 0.114           | -5.978 (1.045)                     | 0.435                             | 8                 | 0.528             |
| 5.033                             | 8                 | 0.055           | -5.837 (0.7457)                    | 1.548                             | 9                 | 0.245             |
| 2.936                             | 7                 | 0.13            | -6.634 (1.124)                     | 4.584                             | 8                 | 0.0698            |
| 2.05                              | 8                 | 0.019           | -7.810 (1.650)                     | 16.524                            | 9                 | <b>0.0028</b>     |
| NA                                | NA                | NA              | NA                                 | NA                                | NA                | NA                |
|                                   |                   |                 | -4.943 (0.121)                     |                                   |                   |                   |
| 1.216                             | 28                | 0.280           | -5.313 (0.192)                     | 31.085                            | 29                | <b>&lt;0.001</b>  |
| 5.923                             | 29                | <b>0.021</b>    | -5.300 (0.218)                     | NA                                | NA                | NA                |
|                                   |                   |                 | -4.976 (0.459)                     |                                   |                   |                   |
| 0.941                             | 6                 | 0.37            | -4.564 (1.113)                     | 9.432                             | 7                 | <b>0.018</b>      |
| 0.758                             | 6                 | 0.418           | -4.621 (1.525)                     | 6.987                             | 7                 | <b>0.033</b>      |
|                                   |                   |                 | -4.561 (1.179)                     |                                   |                   |                   |
| 0.784                             | 12                | 0.393           | -3.672 (0.573)                     | 0.369                             | 13                | 0.54              |
| 0.089                             | 11                | 0.772           | -4.903 (0.851)                     | 0.067                             | 12                | 0.800             |
| 0.002                             | 10                | 0.964           | -4.469 (1.172)                     | 0.227                             | 11                | 0.643             |
|                                   |                   |                 | -3.951 (0.488)                     |                                   |                   |                   |
| 2.949                             | 15                | 0.107           | -3.424 (0.405)                     | 2.729                             | 16                | 0.118             |
| 0.73                              | 16                | 0.406           | -4.006 (0.421)                     | 4.319                             | 17                | 0.053             |
|                                   |                   |                 |                                    |                                   |                   |                   |
| 0.248                             | 6                 | 0.634           | -3.608 (1.930)                     | 0.661                             | 7                 | 0.443             |
| 0.186                             | 8                 | 0.678           | -4.702 (1.404)                     | 0.013                             | 9                 | 0.912             |
|                                   |                   |                 | -5.093 (0.4660)                    |                                   |                   |                   |
| 4.304                             | 21                | <b>0.051</b>    | -3.660 (0.4271)                    | 0.762                             | 22                | 0.392             |
| 4.162                             | 23                | 0.053           | -3.963 (0.4163)                    | 0.064                             | 24                | 0.803             |
| 4.894                             | 25                | <b>0.036</b>    | -4.274 (0.4034)                    | NA                                | NA                | NA                |
| 0.023                             | 19                | 0.882           | -4.951 (0.551)                     | 1.077                             | 20                | 0.312             |
| 0.011                             | 12                | 0.918           | -2.700 (1.857)                     | 47.01                             | 13                | <b>&lt;0.0001</b> |
| NA                                | NA                | NA              | -11.73 (3.4x10 <sup>38</sup> )     | NA                                | NA                | NA                |
|                                   |                   |                 | -4.634 (0.587)                     |                                   |                   |                   |
| 3.539                             | 6                 | 0.109           | -7.173 (1.694)                     | 0.265                             | 7                 | 0.623             |
| 0.418                             | 10                | 0.532           | -4.099 (0.637)                     | 0.025                             | 11                | 0.877             |
| 1.328                             | 5                 | 0.301           | -6.126 (0.858)                     | 2.667                             | 6                 | 0.154             |
|                                   |                   |                 | -4.315 (0.559)                     |                                   |                   |                   |
| 0.717                             | 7                 | 0.425           | -3.481 (1.964)                     | 2.359                             | 8                 | 0.163             |
| 0.193                             | 4                 | 0.683           | -5.804 (1.501)                     | 3.409                             | 5                 | 0.124             |
| 1.602                             | 9                 | 0.238           | -3.085 (0.576)                     | 0.018                             | 10                | 0.896             |
|                                   |                   |                 | -2.711 (2.925)                     |                                   |                   |                   |
| 0.097                             | 4                 | 0.771           | -2.132 (1.535)                     | 0.528                             | 5                 | 0.500             |
| 0.044                             | 6                 | 0.84            | -3.067 (0.919)                     | 2.985                             | 7                 | 0.128             |
| 0.029                             | 4                 | 0.874           | -3.227 (0.849)                     | 4.075                             | 5                 | 0.099             |

| Mean Fecundity<br>(n offspring ind <sup>-1</sup> )<br>(SEM) | Median<br>Fecundity<br>(n offspring ind <sup>-1</sup> ) | Fecundity<br>Kruskal-Wallis<br>Statistic | Fecundity<br>Kruskal-Wallis<br>p | Fecundity Mean<br>Rank Diff Dunns<br>Mult. Comp. | Dunn's Mult.<br>Comp.<br>p |
|-------------------------------------------------------------|---------------------------------------------------------|------------------------------------------|----------------------------------|--------------------------------------------------|----------------------------|
| 26.68 (0.54)                                                | 27                                                      | 20.19                                    | < 0.0001                         |                                                  |                            |
| 25.64 (1.3)                                                 | 27                                                      |                                          |                                  | 2.068                                            | > 0.9999                   |
| <b>22.08 (0.76)</b>                                         | 21.5                                                    |                                          |                                  | 23.28                                            | <b>0.0001</b>              |
| 30.14 (0.37)                                                | 30                                                      | 48.34                                    | < 0.0001                         |                                                  |                            |
| 31.32 (0.84)                                                | 31                                                      |                                          |                                  | -6.407                                           | > 0.9999                   |
| 29.83 (0.46)                                                | 30                                                      |                                          |                                  | 0.9091                                           | > 0.9999                   |
| <b>17.90 (0.77)</b>                                         | <b>17</b>                                               |                                          |                                  | 40.86                                            | < <b>0.0001</b>            |
| 32.24 (0.35)                                                | 32                                                      | 193                                      | < 0.0001                         |                                                  |                            |
| 30.91 (0.55)                                                | 32                                                      |                                          |                                  | -3.965                                           | > 0.9999                   |
| 31.07 (0.56)                                                | 32                                                      |                                          |                                  | 0.172                                            | > 0.9999                   |
| 30.35 (0.99)                                                | 32                                                      |                                          |                                  | -10.67                                           | > 0.9999                   |
| 31.12 (0.63)                                                | 32                                                      |                                          |                                  | -20.88                                           | > 0.9999                   |
| <b>22.18 (0.56)</b>                                         | <b>23</b>                                               |                                          |                                  | 117.8                                            | < <b>0.0001</b>            |
| <b>3.85 (0.12)</b>                                          | <b>4</b>                                                |                                          |                                  | 174.2                                            | < <b>0.0001</b>            |
| 21.89 (0.81)                                                | 23                                                      | 22.21                                    | < 0.0001                         |                                                  |                            |
| 20.52 (1.7)                                                 | 24                                                      |                                          |                                  | -0.913                                           | > 0.9999                   |
| <b>19.09 (0.91)</b>                                         | <b>21</b>                                               |                                          |                                  | 32.91                                            | <b>0.0001</b>              |
| 22.22 (0.91)                                                | 23                                                      | 6.193                                    | <b>0.0452</b>                    |                                                  |                            |
| 23.58 (0.57)                                                | 25                                                      |                                          |                                  | -5.221                                           | 0.581                      |
| 19.20 (1.7)                                                 | 21                                                      |                                          |                                  | 7.672                                            | 0.2878                     |
| 24.90 (0.56)                                                | 25                                                      | 8.634                                    | <b>0.0346</b>                    |                                                  |                            |
| 22.75 (1.1)                                                 | 23.5                                                    |                                          |                                  | 9.879                                            | 0.6444                     |
| 23.91 (1.1)                                                 | 26                                                      |                                          |                                  | -0.1978                                          | > 0.9999                   |
| 20.75 (1.2)                                                 | 21                                                      |                                          |                                  | 19.32                                            | <b>0.0459</b>              |
| 16.21 (2.3)                                                 | 21                                                      | 4.036                                    | 0.1329                           |                                                  |                            |
| 19.45 (1.6)                                                 | 21                                                      |                                          |                                  | -4.694                                           | 0.8255                     |
| 15.59 (1.4)                                                 | 16                                                      |                                          |                                  | 6.352                                            | 0.5354                     |
| 25.13 (4.6)                                                 | 25.5                                                    | 17.5                                     | <b>0.0002</b>                    |                                                  |                            |
| 25.45 (0.38)                                                | 25.5                                                    |                                          |                                  | -1.548                                           | > 0.9999                   |
| <b>22.04 (0.84)</b>                                         | <b>21</b>                                               |                                          |                                  | 18.61                                            | <b>0.0026</b>              |
| 16.30 (0.96)                                                | 18.5                                                    | 152.4                                    | < 0.0001                         |                                                  |                            |
| 15.25 (1.0)                                                 | 16                                                      |                                          |                                  | 13.29                                            | > 0.9999                   |
| 16.45 (0.86)                                                | 18                                                      |                                          |                                  | -0.5011                                          | > 0.9999                   |
| 17.73 (0.98)                                                | 19                                                      |                                          |                                  | -17.94                                           | > 0.9999                   |
| 16.38 (0.93)                                                | 16                                                      |                                          |                                  | 0.4161                                           | > 0.9999                   |
| <b>6.55 (0.36)</b>                                          | <b>6</b>                                                |                                          |                                  | 100.8                                            | < <b>0.0001</b>            |
| <b>2.96 (0.13)</b>                                          | <b>3</b>                                                |                                          |                                  | 153.3                                            | < <b>0.0001</b>            |
| 26.30 (1.4)                                                 | 27                                                      | 24.91                                    | < 0.0001                         |                                                  |                            |
| 26.15 (1.1)                                                 | 28                                                      |                                          |                                  | -2.85                                            | > 0.9999                   |
| 21.77 (2.0)                                                 | 26.5                                                    |                                          |                                  | 6.577                                            | > 0.9999                   |
| <b>14.74 (1.1)</b>                                          | <b>16</b>                                               |                                          |                                  | 30.98                                            | <b>0.0001</b>              |
| 16.83 (1.3)                                                 | 18.5                                                    | 27.3                                     | < 0.0001                         |                                                  |                            |
| 16.60 (0.80)                                                | 16.5                                                    |                                          |                                  | 6.003                                            | > 0.9999                   |
| 16.60 (1.4)                                                 | 17.5                                                    |                                          |                                  | 4.178                                            | > 0.9999                   |
| <b>6.56 (1.3)</b>                                           | <b>6.5</b>                                              |                                          |                                  | 30.53                                            | < <b>0.0001</b>            |
| 7.54 (0.69)                                                 | 6                                                       | 10.13                                    | <b>0.0175</b>                    |                                                  |                            |
| 8.96 (1.1)                                                  | 7                                                       |                                          |                                  | -3.814                                           | > 0.9999                   |
| 10.74 (1.3)                                                 | 9                                                       |                                          |                                  | -11.88                                           | 0.3063                     |
| <b>14.71 (1.9)</b>                                          | <b>14</b>                                               |                                          |                                  | -23.47                                           | <b>0.0089</b>              |

| <b>Max Fecundity<br/>95th Percentile</b> | <b>Lifespan<br/>Reproduction<br/>(SEM)</b> | <b>n</b> |
|------------------------------------------|--------------------------------------------|----------|
| 30.85                                    | 61.66 (1.9)                                | 22       |
| 29.85                                    | 63.70 (4.4)                                | 20       |
| 28                                       | 78.90 (4.4)                                | 23       |
| 33                                       | 72.98 (3.0)                                | 22       |
| 45                                       | 72.93 (3.1)                                | 19       |
| 33                                       | 70.51 (2.7)                                | 23       |
| 24                                       | 87.02 (1.9)                                | 21       |
| 34                                       | 62.37 (1.5)                                | 49       |
| 34                                       | 65.56 (1.6)                                | 47       |
| 34                                       | 60.90 (1.9)                                | 43       |
| 34                                       | 59.98 (2.2)                                | 49       |
| 34                                       | 65.49 (1.5)                                | 51       |
| 27                                       | 84.31 (1.6)                                | 40       |
| 6                                        | 50.78 (3.1)                                | 53       |
| 25                                       | 62.04 (2.7)                                | 51       |
| 25.65                                    | 58.85 (3.5)                                | 48       |
| 24                                       | 79.69 (2.9)                                | 46       |
| 28                                       | 65.59 (3.8)                                | 16       |
| 27                                       | 59.33 (2.4)                                | 19       |
| 27                                       | 74.94 (4.9)                                | 16       |
| 28.95                                    | 71.30 (3.1)                                | 20       |
| 28                                       | 57.12 (4.3)                                | 24       |
| 28.8                                     | 69.39 (3.9)                                | 23       |
| 28.75                                    | 80.98 (2.7)                                | 24       |
| 27                                       | 58.95 (7.7)                                | 20       |
| 30.7                                     | 69.29 (5.1)                                | 18       |
| 27.4                                     | 78.5 (4.6)                                 | 21       |
| 28                                       | 57.25 (3.2)                                | 16       |
| 28                                       | 56.99 (2.9)                                | 22       |
| 32.75                                    | 85.20 (2.6)                                | 24       |
| 22                                       | 63.62 (3.0)                                | 39       |
| 24.95                                    | 67.79 (3.2)                                | 40       |
| 22.75                                    | 63.35 (3.1)                                | 44       |
| 25                                       | 62.29 (2.9)                                | 41       |
| 25.85                                    | 65.36 (2.2)                                | 42       |
| 12.25                                    | 63.19 (2.5)                                | 44       |
| 4.65                                     | 56.99 (3.2)                                | 46       |
| 39.6                                     | 79.59 (2.5)                                | 20       |
| 31.95                                    | 80.22 (2.7)                                | 20       |
| 31.7                                     | 75.71 (4.3)                                | 22       |
| 22                                       | 87.55 (2.3)                                | 19       |
| 22                                       | 81.60 (3.0)                                | 21       |
| 24.85                                    | 83.11 (2.0)                                | 20       |
| 22                                       | 74.24 (4.4)                                | 10       |
| 18                                       | 75.26 (4.4)                                | 18       |
| 13.5                                     | 70.15 (2.1)                                | 24       |
| 20                                       | 73.43 (2.6)                                | 22       |
| 24.8                                     | 74.77 (2.1)                                | 23       |
| 25                                       | 76.84 (3.1)                                | 17       |
